# Supplementary material
Source: Springer Nature journal article supplement (https://www.springermedizin.de/resource/supplementary/13098_2014_418_MOESM8_ESM.pdf/9670902)
Supplement: MOESM8 [file 9670902]

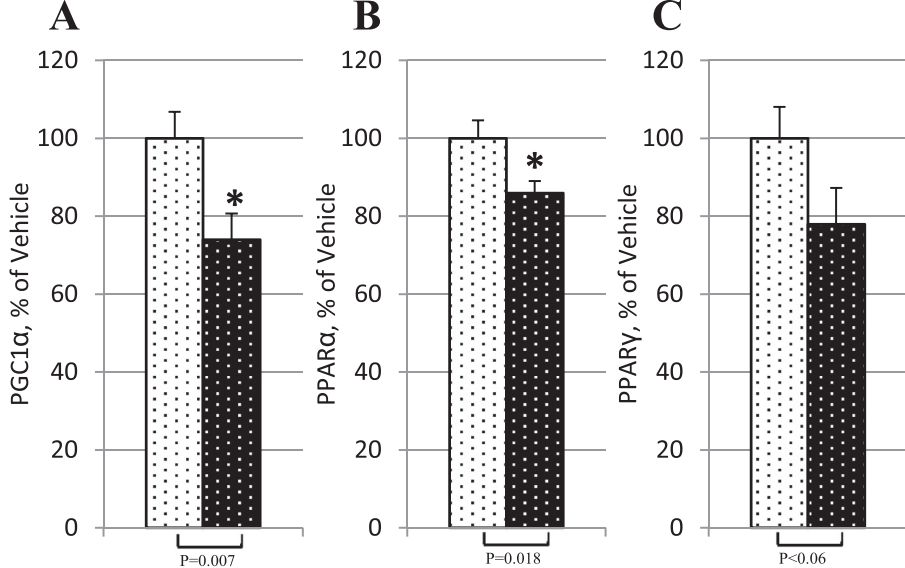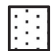

SHR rats treated with vehicle control

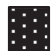

SHR rats treated with  
Timed Daily Bromocriptine
